# Supplementary material for: The role of new inflammatory indices in the prediction of endoscopic and histological activity in inflammatory bowel disease patients
Source: PubMed Central journal article supplement (PMC11608588; doi:10.1097/meg.0000000000002842), 2024-09-12
Supplement: ejgh-37-024-s001.pdf [file ejgh-37-024-s001.pdf]

Supplementary Table 1 - Formulas to calculate the inflammatory indices.

| <b>INFLAMMATORY INDICES</b>                                  | <b>FORMULAS</b>                                                                             |
|--------------------------------------------------------------|---------------------------------------------------------------------------------------------|
| <b>Systemic inflammation response index (SIRI)</b>           | $(\text{Neutrophil} \times \text{Monocytes}) / \text{Lymphocytes}$                          |
| <b>Neutrophil-to-Lymphocytes ratio (NLR)</b>                 | $\text{Neutrophil} / \text{Lymphocytes}$                                                    |
| <b>Platelets-to-Lymphocytes ratio (PLR)</b>                  | $\text{Platelets} / \text{Lymphocytes}$                                                     |
| <b>Lymphocytes-to-Monocytes ratio (LMR)</b>                  | $\text{Lymphocytes} / \text{Monocytes}$                                                     |
| <b>Eosinophil-to-Lymphocytes ratio (ELR)</b>                 | $\text{Eosinophil} / \text{Lymphocytes}$                                                    |
| <b>Eosinophil and Neutrophil-to-Lymphocytes ratio (ENLR)</b> | $(\text{Eosinophil} \times \text{Neutrophil}) / \text{Lymphocytes}$                         |
| <b>C-Reactive Protein Albumin ratio (CAR)</b>                | $\text{C-Reactive Protein} / \text{Fecal Calprotectin}$                                     |
| <b>Systemic immune inflammation index (SII)</b>              | $(\text{Platelets} \times \text{Neutrophil}) / \text{Lymphocytes}$                          |
| <b>Monocytes-to-Lymphocytes ratio (MLR)</b>                  | $\text{Monocytes} / \text{Lymphocytes}$                                                     |
| <b>Aggregate index of systemic inflammation (AISI)</b>       | $(\text{Neutrophils} \times \text{Platelets} \times \text{Monocytes}) / \text{Lymphocytes}$ |
